# Supplementary material for: Low-dose CD7 chimeric antigen receptor T cells for relapsed/refractory T-cell lymphomas: single-arm, open-label, phase I study
Source: Research Square preprint supplement (doi:10.21203/rs.3.rs-7957221/v1), 2025-12-22
Supplement: Supplementary file 1 [file 2a454ebf43471786dc9d0fac.pdf]

| Table 2 Adverse Events among subgroups by different dose. |  |                             |   |   |   |                                         |   |   |   |                             |   |   |   |                                     |    |    |   |
|-----------------------------------------------------------|--|-----------------------------|---|---|---|-----------------------------------------|---|---|---|-----------------------------|---|---|---|-------------------------------------|----|----|---|
| Cohort                                                    |  | 1×10 <sup>4</sup> (±30%)/kg |   |   |   | Phase Ia<br>5×10 <sup>4</sup> (±30%)/kg |   |   |   | 1×10 <sup>5</sup> (±30%)/kg |   |   |   | Phas<br>1×10 <sup>5</sup> (±30%)/kg |    |    |   |
| AEs within day30                                          |  | N=40                        |   |   |   |                                         |   |   |   |                             |   |   |   |                                     |    |    |   |
| Grade                                                     |  | 1-2                         | 3 | 4 | 5 | 1-2                                     | 3 | 4 | 5 | 1-2                         | 3 | 4 | 5 | 1-2                                 | 3  | 4  | 5 |
| CRS                                                       |  |                             |   |   |   |                                         |   |   |   |                             |   |   |   |                                     |    |    |   |
| Total score                                               |  | 2                           | 0 | 0 | 0 | 3                                       | 0 | 0 | 0 | 2                           | 0 | 0 | 0 | 28                                  | 2  | 0  | 0 |
| Fever (≥38°C)                                             |  | 3                           | 0 | 0 | 0 | 3                                       | 0 | 0 | 0 | 2                           | 0 | 0 | 0 | 12                                  | 13 | 0  | 0 |
| Hypotension                                               |  | 0                           | 0 | 0 | 0 | 0                                       | 0 | 0 | 0 | 1                           | 0 | 0 | 0 | 1                                   | 0  | 0  | 0 |
| Hypoxia                                                   |  | 0                           | 0 | 0 | 0 | 0                                       | 0 | 0 | 0 | 0                           | 0 | 0 | 0 | 4                                   | 0  | 0  | 0 |
| ICANS                                                     |  |                             |   |   |   |                                         |   |   |   |                             |   |   |   |                                     |    |    |   |
| Total score                                               |  | 0                           | 0 | 0 | 0 | 0                                       | 0 | 0 | 0 | 0                           | 0 | 0 | 0 | 1                                   | 0  | 1  | 0 |
| Depressed consciousness                                   |  | 0                           | 0 | 0 | 0 | 0                                       | 0 | 0 | 0 | 0                           | 0 | 0 | 0 | 0                                   | 0  | 1  | 0 |
| Seizure                                                   |  | 0                           | 0 | 0 | 0 | 0                                       | 0 | 0 | 0 | 0                           | 0 | 0 | 0 | 1                                   | 0  | 1  | 0 |
| Motor weakness                                            |  | 0                           | 0 | 0 | 0 | 0                                       | 0 | 0 | 0 | 0                           | 0 | 0 | 0 | 1                                   | 0  | 0  | 0 |
| Elevated ICP or cerebra                                   |  | 0                           | 0 | 0 | 0 | 0                                       | 0 | 0 | 0 | 0                           | 0 | 0 | 0 | 0                                   | 0  | 1  | 0 |
| GVHD*                                                     |  |                             |   |   |   |                                         |   |   |   |                             |   |   |   |                                     |    |    |   |
| Total score                                               |  | 0                           | 0 | 0 | 0 | 0                                       | 0 | 0 | 0 | 0                           | 0 | 0 | 0 | 4                                   | 0  | 0  | 0 |
| Skin                                                      |  | 0                           | 0 | 0 | 0 | 0                                       | 0 | 0 | 0 | 0                           | 0 | 0 | 0 | 2                                   | 0  | 0  | 0 |
| Liver                                                     |  | 0                           | 0 | 0 | 0 | 0                                       | 0 | 0 | 0 | 0                           | 0 | 0 | 0 | 1                                   | 0  | 0  | 0 |
| Intestinal                                                |  | 0                           | 0 | 0 | 0 | 0                                       | 0 | 0 | 0 | 0                           | 0 | 0 | 0 | 1                                   | 0  | 0  | 0 |
| Hematologic event                                         |  |                             |   |   |   |                                         |   |   |   |                             |   |   |   |                                     |    |    |   |
| Neutropenia                                               |  | 1                           | 0 | 2 | 0 | 0                                       | 0 | 3 | 0 | 0                           | 0 | 3 | 0 | 0                                   | 1  | 30 | 0 |
| Leukopenia                                                |  | 1                           | 0 | 2 | 0 | 0                                       | 0 | 3 | 0 | 0                           | 0 | 3 | 0 | 0                                   | 1  | 30 | 0 |
| Thrombocytopenia                                          |  | 1                           | 0 | 2 | 0 | 0                                       | 0 | 3 | 0 | 1                           | 0 | 2 | 0 | 4                                   | 5  | 18 | 0 |
| Anemia                                                    |  | 1                           | 2 | 0 | 0 | 0                                       | 3 | 0 | 0 | 0                           | 3 | 0 | 0 | 6                                   | 5  | 20 | 0 |
| Lymphocytopenia                                           |  | 1                           | 0 | 2 | 0 | 0                                       | 0 | 3 | 0 | 0                           | 0 | 3 | 0 | 0                                   | 1  | 30 | 0 |
| Infections                                                |  |                             |   |   |   |                                         |   |   |   |                             |   |   |   |                                     |    |    |   |
| Sepsis                                                    |  | 0                           | 1 | 0 | 0 | 1                                       | 0 | 0 | 0 | 0                           | 0 | 0 | 0 | 0                                   | 0  | 0  | 0 |
| Intestinal infection                                      |  | 0                           | 0 | 0 | 0 | 0                                       | 0 | 0 | 0 | 0                           | 0 | 0 | 0 | 0                                   | 1  | 0  | 0 |
| Lung infection                                            |  | 0                           | 1 | 0 | 0 | 0                                       | 0 | 0 | 0 | 0                           | 0 | 0 | 0 | 0                                   | 2  | 0  | 0 |
| Skin infection                                            |  | 0                           | 0 | 0 | 0 | 0                                       | 1 | 0 | 0 | 0                           | 0 | 0 | 0 | 0                                   | 1  | 0  | 0 |
| Oral ulcer                                                |  | 1                           | 0 | 0 | 0 | 0                                       | 0 | 0 | 0 | 0                           | 0 | 0 | 0 | 3                                   | 0  | 0  | 0 |
| Infection pathogen                                        |  |                             |   |   |   |                                         |   |   |   |                             |   |   |   |                                     |    |    |   |
| Virus                                                     |  | 0                           | 1 | 0 | 0 | 0                                       | 0 | 0 | 0 | 0                           | 0 | 0 | 0 | 2                                   | 2  | 0  | 0 |
| Bacteria                                                  |  | 0                           | 1 | 0 | 0 | 1                                       | 1 | 0 | 0 | 0                           | 0 | 0 | 0 | 1                                   | 2  | 0  | 0 |
| Fungus                                                    |  | 1                           | 0 | 0 | 0 | 0                                       | 0 | 0 | 0 | 0                           | 0 | 0 | 0 | 0                                   | 0  | 0  | 0 |
| Gastrointestinal event                                    |  |                             |   |   |   |                                         |   |   |   |                             |   |   |   |                                     |    |    |   |
| Abdominal distension                                      |  | 1                           | 1 | 0 | 0 | 1                                       | 0 | 0 | 0 | 1                           | 0 | 0 | 0 | 3                                   | 8  | 6  | 0 |
| Loss of appetite                                          |  | 0                           | 0 | 0 | 0 | 0                                       | 0 | 0 | 0 | 0                           | 0 | 0 | 0 | 0                                   | 1  | 0  | 0 |
| Nausea/Vomiting                                           |  | 0                           | 0 | 0 | 0 | 1                                       | 0 | 0 | 0 | 1                           | 0 | 0 | 0 | 3                                   | 2  | 0  | 0 |
| Diarrhea                                                  |  | 1                           | 0 | 0 | 0 | 0                                       | 0 | 0 | 0 | 0                           | 0 | 0 | 0 | 8                                   | 0  | 0  | 0 |
| Cardiovascular event                                      |  |                             |   |   |   |                                         |   |   |   |                             |   |   |   |                                     |    |    |   |
| Chest pain                                                |  | 0                           | 0 | 0 | 0 | 0                                       | 0 | 0 | 0 | 0                           | 0 | 0 | 0 | 0                                   | 0  | 0  | 0 |
| Tachycardia                                               |  | 0                           | 0 | 0 | 0 | 0                                       | 0 | 0 | 0 | 0                           | 0 | 0 | 0 | 1                                   | 0  | 0  | 0 |
| Heart failure                                             |  | 0                           | 0 | 0 | 0 | 0                                       | 0 | 0 | 0 | 0                           | 0 | 0 | 0 | 1                                   | 0  | 0  | 0 |
| General conditions                                        |  |                             |   |   |   |                                         |   |   |   |                             |   |   |   |                                     |    |    |   |
| Fatigue                                                   |  | 1                           | 0 | 0 | 0 | 1                                       | 0 | 0 | 0 | 1                           | 0 | 0 | 0 | 5                                   | 0  | 0  | 0 |
| Flu-like symptom                                          |  | 0                           | 0 | 0 | 0 | 0                                       | 0 | 0 | 0 | 1                           | 0 | 0 | 0 | 3                                   | 0  | 0  | 0 |
| Rash                                                      |  | 1                           | 0 | 0 | 0 | 1                                       | 0 | 0 | 0 | 0                           | 0 | 0 | 0 | 9                                   | 0  | 0  | 0 |
| Peripheral edema                                          |  | 0                           | 0 | 0 | 0 | 0                                       | 0 | 0 | 0 | 1                           | 0 | 0 | 0 | 3                                   | 0  | 0  | 0 |
| IEC-HS                                                    |  | 0                           | 0 | 0 | 0 | 0                                       | 0 | 0 | 0 | 0                           | 0 | 0 | 0 | 2                                   | 0  | 0  | 0 |
| Capillary leak syndrome                                   |  | 0                           | 0 | 0 | 0 | 0                                       | 0 | 0 | 0 | 0                           | 0 | 0 | 0 | 1                                   | 0  | 0  | 0 |
| Laboratory values                                         |  |                             |   |   |   |                                         |   |   |   |                             |   |   |   |                                     |    |    |   |
| AST increase                                              |  | 1                           | 0 | 0 | 0 | 2                                       | 0 | 0 | 0 | 1                           | 1 | 0 | 0 | 3                                   | 0  | 0  | 0 |
| ALT increase                                              |  | 1                           | 1 | 0 | 0 | 0                                       | 0 | 0 | 0 | 1                           | 0 | 0 | 0 | 6                                   | 1  | 0  | 0 |
| Bilirubin increase                                        |  | 1                           | 0 | 0 | 0 | 0                                       | 0 | 0 | 0 | 1                           | 0 | 0 | 0 | 3                                   | 0  | 0  | 0 |
| Creatine increase                                         |  | 0                           | 0 | 0 | 0 | 1                                       | 0 | 0 | 0 | 0                           | 0 | 0 | 0 | 4                                   | 0  | 0  | 0 |
| LDH increase                                              |  | 1                           | 0 | 0 | 0 | 0                                       | 0 | 0 | 0 | 2                           | 0 | 0 | 0 | 8                                   | 0  | 0  | 0 |
| Coagulopathy                                              |  | 1                           | 0 | 0 | 0 | 1                                       | 0 | 0 | 0 | 1                           | 0 | 0 | 0 | 20                                  | 0  | 0  | 0 |
| Hypoalbuminemia                                           |  | 0                           | 1 | 0 | 0 | 2                                       | 0 | 0 | 0 | 2                           | 0 | 0 | 0 | 7                                   | 1  | 0  | 0 |
| Hypocalcemia                                              |  | 0                           | 1 | 0 | 0 | 0                                       | 0 | 0 | 0 | 0                           | 0 | 0 | 0 | 4                                   | 2  | 0  | 0 |
| Hypokalemia                                               |  | 1                           | 1 | 0 | 0 | 2                                       | 0 | 0 | 0 | 2                           | 0 | 0 | 0 | 7                                   | 2  | 0  | 0 |
| Hyponatremia                                              |  | 0                           | 1 | 0 | 0 | 1                                       | 0 | 0 | 0 | 1                           | 0 | 0 | 0 | 9                                   | 0  | 0  | 0 |
| AEs after day30**                                         |  | N=37                        |   |   |   |                                         |   |   |   |                             |   |   |   |                                     |    |    |   |
| Grade                                                     |  | 1-2                         | 3 | 4 | 5 | 1-2                                     | 3 | 4 | 5 | 1-2                         | 3 | 4 | 5 | 1-2                                 | 3  | 4  | 5 |
| Acute GVHD*                                               |  |                             |   |   |   |                                         |   |   |   |                             |   |   |   |                                     |    |    |   |
| Total score                                               |  | 0                           | 0 | 0 | 0 | 0                                       | 0 | 0 | 0 | 0                           | 0 | 0 | 0 | 0                                   | 0  | 0  | 0 |
| Skin                                                      |  | 0                           | 0 | 0 | 0 | 0                                       | 0 | 0 | 0 | 0                           | 0 | 0 | 0 | 0                                   | 0  | 0  | 0 |
| Liver                                                     |  | 0                           | 0 | 0 | 0 | 0                                       | 0 | 0 | 0 | 0                           | 0 | 0 | 0 | 0                                   | 0  | 0  | 0 |
| Intestinal                                                |  | 0                           | 0 | 0 | 0 | 0                                       | 0 | 0 | 0 | 0                           | 0 | 0 | 0 | 0                                   | 0  | 0  | 0 |
| Chronic GVHD*                                             |  |                             |   |   |   |                                         |   |   |   |                             |   |   |   |                                     |    |    |   |
| Extensive cGVHD                                           |  | 0                           | 0 | 0 | 0 | 0                                       | 0 | 0 | 0 | 0                           | 0 | 0 | 0 | 1                                   | 1  | 0  | 0 |
| Limited cGVHD                                             |  | 0                           | 0 | 0 | 0 | 0                                       | 0 | 0 | 0 | 0                           | 0 | 0 | 0 | 2                                   | 0  | 0  | 0 |
| Infections                                                |  |                             |   |   |   |                                         |   |   |   |                             |   |   |   |                                     |    |    |   |
| Virus                                                     |  | 0                           | 0 | 0 | 1 | 0                                       | 0 | 0 | 1 | 0                           | 0 | 0 | 0 | 3                                   | 4  | 0  | 0 |
| Bacteria                                                  |  | 0                           | 0 | 0 | 0 | 0                                       | 0 | 0 | 0 | 0                           | 0 | 0 | 0 | 2                                   | 3  | 0  | 4 |
| Fungus                                                    |  | 0                           | 0 | 1 | 0 | 0                                       | 0 | 0 | 0 | 0                           | 0 | 0 | 0 | 5                                   | 1  | 0  | 1 |
| Secondary neoplasm                                        |  | 0                           | 0 | 0 | 0 | 0                                       | 0 | 0 | 0 | 0                           | 0 | 0 | 0 | 0                                   | 0  | 0  | 0 |

Listed are all adverse events, which occurred within 30 days post-infusion in the 40 patients, regardless of whether the investigators attributed the events to the CAR T cell treatment.

\*GVHD assessment only included patients who relapsed after alloSCT and subsequently received donor-derived CD7 CAR-T therapy.

\*\*AEs after day 30 only applied to the 37 patients who achieved a response to CD7 CAR-T therapy and did not receive subsequent SCT. AEs recording was discontinued for patients who withdrew from the study after relapse. AEs were graded according to CTCAE v5.0.

Abbreviation: AE, adverse event; AlloSCT, allogeneic stem-cell transplantation; ALT, Alanine aminotransferase; AST, Aspartate aminotransferase; CRS, cytokine release symptom; GVHD, graft-versus-host disease; ICANS, immune effector cell associated neurotoxicity syndrome; ICP, intracranial pressure; IEC-HS, Immune effector cell associated HLH-like syndrome; LDH, lactate Dehydrogenase.
