# Supplementary material for: Low-dose CD7 chimeric antigen receptor T cells for relapsed/refractory T-cell lymphomas: single-arm, open-label, phase I study
Source: Research Square preprint supplement (doi:10.21203/rs.3.rs-7957221/v1), 2025-12-22
Supplement: Supplementary file 1 [file 19b0e130da4cdd8ec54797f7.docx]

**Supplementary materials**

**TRIALDESIGN**

**Trial Overview**

A phase Ia/Ib, open-label, non-randomized, single-arm clinical trial was designed to evaluate the safety and tolerability of CD7 CAR T cells in patients with relapsed/refractory T-cell Lymphoma. The protocol was approved by the institutional review board (IRB) in Beijing GoBroad Boren Hospital.

After signing informed consent and meeting eligibility criteria, qualified subjects will be sequentially enrolled into three dose groups (1×10⁴, 5×10⁴, and 10×10⁴ cells) for single-dose administration. The dose-escalation study follows a "3+3" design, with 3-6 subjects completing single-dose treatment per cohort.

Following the 14-day dose-limiting toxicity (DLT) assessment window after the last subject's administration in each cohort, the Safety Review Committee (SRC) will evaluate clinical safety and pharmacokinetic data to approve escalation to the next dose level.

DLT occurrence triggers cohort expansion:

If 1/3 subjects experiences DLT, 3 additional subjects will be enrolled (total n=6)

→ No DLT in expansion: continue escalation

→ 1 DLT in expansion: stop escalation

→ >1 DLT in expansion: de-escalate and enroll 3 subjects at lower dose

After completing maximum dose escalation, the SRC will select one dose level for Phase Ib expansion.

**Inclusion criteria**

In order to be eligible to participate in this study, an individual must meet all of the following criteria:

1. Aged >=18 years, no gender limit;

2. The expected survival time exceeds 12 weeks;

3. ECOG score 0-2;

4. T-cell lymphoma diagnosed according to WHO 2016 criteria (including but not limited to T lymphoblastic lymphoma/leukemia, NK/T cell lymphoma, peripheral T cell lymphoma, vascular immunoblastic lymphoma, enteropathy T cell lymphoma, metaplastic large cell lymphoma, cutaneous T cell lymphoma, liver and spleen T cell lymphoma, T naive lymphoblastic leukemia, etc.);

5. Patients who were clearly diagnosed as target-positive T-cell lymphoma by pathological examination during screening and met one of the following conditions:

(1) PR was not obtained after at least 2 lines of standardized treatment regimen, and no other regular treatment regimen was determined by the investigator;

(2) Relapse or progression of the disease after standard treatment, and there is no other formal treatment plan as determined by the researcher;

(3) Recurrence after autologous or allogeneic hematopoietic stem cell transplantation;

6. At least one evaluable tumor lesion (>=1.5cm in diameter) or tumor cells in bone marrow evaluable;

7. Blood count and coagulation function meet the following requirements:

(1) Hemoglobin >=70 g/L (blood transfusion support allowed);

(2) Platelet count >=30x10^9/L (blood transfusion support allowed);

(3) PT and APTT<=1.5 ULN;

8. Liver and kidney functions, cardiopulmonary functions meet the following requirements:

(1) Creatinine <=1.5 ULN, or creatinine clearance >=60 ml/ min;

(2) Left ventricular ejection fraction >=45%;

(3) Blood oxygen saturation >90% (indoor conditions, no oxygen);

(4) Total bilirubin <=1.5ULN; ALT and AST<=2.5ULN;

9. Can understand the test and sign the informed consent voluntarily;

10. Agree to have no childbearing requests or plans for one year after enrolling in the clinical trial.

**Exclusion criteria**

An individual who meets any of the following criteria will be excluded from participation in this study:

1.Incomplete cured malignancies other than malignant lymphoma within 5 years prior to screening, with the exception of adequately treated cervical carcinoma in situ, basal cell or squamous cell skin cancer, local prostate cancer after radical surgery, ductal carcinoma in situ of the breast after radical surgery, and other malignancies not apparently associated with hematologic tumorigenesis as determined by the investigator;

2.Known presence of HIV infection (anti-HIV positive), active hepatitis B (positive for HBsAg, or positive for HBcAb and positive for HBV-DNA PCR), or active hepatitis C (positive for HCV antibody and positive for HCV-RNA PCR), or syphilis infection (positive for anti-TP);

3.Systemic diseases judged by researchers to be unstable: including but not limited to metabolic diseases requiring drug treatment;

4.Active or uncontrolled infections (other than mild genitourinary and upper respiratory tract infections) requiring systemic treatment during the 7 days prior to screening;

5.Patients suffering from graft-versus-host disease (GVHD) or needing immunosuppressive drugs;

6. Patients who were receiving systemic steroid therapy (prednisone >=30mg/ day or equivalent) within 7 days prior to screening or who were determined by the investigator to require long-term systemic steroid therapy during treatment (other than inhalation or topical use);

7. Symptoms of severe respiratory failure;

8. Intracranial hypertension or cerebral disturbance of consciousness;

9. Severe mental disorder;

10. Pregnant or lactating patients;

11. Participated in other clinical trials within 3 months prior to screening;

12. Evidence of CNS Grade 3 central nervous system invasion during patient screening;

13. The absolute value of lymphocytes was too low to prepare CART cells;

14.Tumor cells were detected in peripheral cells before apheresis in the autotransfusion patients;

15. Conditions considered unsuitable for inclusion by other researchers.

**Definitions of dose-limiting toxicity (DLT)**

Any of the following conditions related to the study drug person.

1. Development of Grade 4 or Grade 5 cytokine release syndrome due to CART infusion therapy; (2) Development of Grade 3 cytokine release syndrome due to CART infusion therapy that has not resolved to less than Grade 2 within 7 days;

(2) Development of Grade 3 CART infusion-induced cytokine release syndrome that has not resolved to less than Grade 2 within 7 days;

(3) Grade 3-5 anaphylactic reaction associated with CART infusion therapy;

(4) Grade 3 or higher organ toxicity associated with CART infusion;

(5) Grade 3 neurotoxicity associated with CART infusion therapy that does not resolve to Grade 2 or below or Grade 4 neurotoxicity within 3 days;

1. Any unanticipated toxicity that, in the judgment of the Investigator or Investigating Agency, warrants termination of the study.

The following are excluded.

(1) Grade 3 to Grade 4 tumor lysis syndrome lasting < days; and

(2) Blood-related toxicity

 Grade 3 neutropenia or Grade 4 neutropenia lasting < 28 days

 Grade 3 anemia or Grade 4 anemia lasting < 28 days

 Grade 3 thrombocytopenia or Grade 4 thrombocytopenia lasting < 28 days;

 In addition to the above neutropenia, anemia, and thrombocytosis granulocytopenia, anemia, and thrombocytopenia; and all blood cell reductions other than those described above.

(3) Non-Blood Related Toxicity

 Fever of any grade, including neutropenic fever;

 Grade 3 diarrhea lasting <72 hours;

 Grade 3 nausea and/or vomiting lasting <72 hours;

 Grade 3 fatigue lasting <7 days;

 Grade 3 to 4 elevated aminotransferases, bilirubin, creatine kinase, urea nitrogen (BUN), or creatinine Higher for <7 days; Asymptomatic and rapidly reversible (resolves to baseline or grade 2 within 7 days) any non and below) of any non-blood-related grade 3 clinical laboratory adverse event.

(4) Aphasia/language impairment or confusion viii cognitive impairment that resolves to grade 1 or below within 2 weeks and to baseline within 4 weeks;

(5) Rapid anaphylactic reaction occurring within 2 hours of cellular infusion (resolves to grade 2 or below after standard treatment related to cellular infusion;

(6) Grade 3 or 4 lymphocyte deficiency.

**Objectives**

1.Primary Objective

To evaluate the safety and tolerability of CD7 CAR T cells dministered intravenously (IV) in patients with relapsed/refractory T-cell lymphoma.

2.Secondary Objectives

(1).To evaluate the efficacy of CD7 CAR T cells in relapsed/refractory T-cell lymphoma

(2).To characterize the pharmacokinetic(PK) profile of CD7 CAR T cells in relapsed/refractory T-cell lymphoma.

**Endpoint**

1. Primary Endpoints

DLTs within 14 days after infusion, the incidence of adverse events (AEs) and specially grade 3 to 5 severe adverse events (SAEs).

2. Secondary Endpoints

3-month overall response rate (ORR) and complete remission rate (CR) at day 30; duration of response (DOR); 2-year overall survival (OS)

**CD7 CAR Vector Design**

The CD7-targeting CAR vector was developed using Shanghai YaKe Biotechnology's IntraBlock® platform, designed to achieve intracellular retention of CD7 molecules. This lentiviral vector (identical to that used in Phase 1 studies[1, 2] incorporated: (1) an anti-human CD7 scFv derived from murine hybridoma cells fused to CD8α hinge/transmembrane domain, 4-1BB co-stimulatory domain and CD3ζ signaling domain; (2) additional CD7-binding and endoplasmic reticulum retention signal domains that enable intracellular CD7 retention to prevent CAR-T cell fratricide, which was used to transduce T cells.

**CART-Cell Manufacture and quality Control**

The CD7 CAR lentiviral vector was GMP-manufactured at Shanghai YaKe and underwent quality control at Beijing Boren Hospital, including microbiological testing (endotoxin, bacteria, mycoplasma) and CAR vector culture for microbial examination, with pre-infusion assessments, all performed in strict compliance with GMP standards and hospital SOPs.CD7 CAR-T cells were generated from leukapheresis-collected PBMCs, which were activated overnight with anti-CD3/CD28 mAbs (T&L Biotech) and transduced the following day with CD7 CAR lentivirus (YK-CD7BB-BL4-002) at MOI=5. Cells were expanded in serum-free TexMACS medium (Miltenyi Biotec) supplemented with 300 IU/ml IL-2. Pre-infusion quality controls included flow cytometry for CAR+% among CD3+ cells and Trypan blue viability testing.

**Detection of CAR-T Cells**

CD7 CAR-T cells in the peripheral blood were regularly measured after infusion by flow cytometry and quantitative real time polymerase chain reaction (qPCR). For flow cytometry analysis of CD7 CAR-T cells, CD45+ lymphocytes were initially gated from lymphocytes, followed by subgating and quantification of CD3+ CAR+ cells detected using CD7 CAR-GREENTM (a recombinant CD7-eGFP fusion protein from Shanghai YaKe Biotechnology Ltd., China), with both the percentage of CAR-T cells in lymphocytes and their absolute count per blood volume unit calculated using a Beckman Cytoflex flow cytometer and FlowJo software (v10.0).

Fluorochrom-conjugated Monoclonal Anti-human Antibodies for Flow Cytometry.

|  | Antibody | Fluorochrome | Clone | Cat | Company |
| --- | --- | --- | --- | --- | --- |
| T-cell  Subsets | CD45 | APC | HI30 | 304037 | Biolegend |
| CD3 | PE-Cy7 | UCHI1 | 300420 | Biolegend |
| CAR | GREENTM | - | - | Shanghai YaKe  Biotechnology Ltd. |
| CD7 | PE | CO7-6B7 | 343106 | Biolegend |
| CD4 | PerCP-Cy5.5 | OKT4 | 317428 | Biolegend |
| CD8 | FITC | RPA-TB | 301050 | Biolegend |

To determine CAR transgene copy numbers, peripheral blood mononuclear cell (PBMC)-derived genomic DNA was isolated with the QIAamp DNA Blood Mini Kit (Qiagen). Quantitative PCR analysis was conducted in three technical replicates employing the ABI 2×TaqMan Universal Master Mix containing AmpErase UNG (Applied Biosystems), run on an Applied Biosystems 7500 real-time PCR platform. CAR-T cell transgene copies per microgram of genomic DNA were quantified by comparing to a standard curve generated from 10-fold serial dilutions of purified CAR plasmid ranging from 10² to 10⁸ copies per microliter.

**Lymphocytes Reconstitution**

The immunophenotypic analysis of lymphocyte subsets (including total CD3+ T cells, CD3+CD4+ helper T cells, and CD3+CD8+ cytotoxic T cells) was conducted on peripheral blood mononuclear cells (PBMCs) collected at various time intervals. These cell populations were characterized using pre-optimized concentrations of fluorochrome-labeled anti-human monoclonal antibodies for precise quantification (see Table S14). A dual-platform methodology was employed to determine absolute cell counts for each subset. All flow cytometric measurements were performed on Beckman Cytoflex instruments, with absolute cell numbers derived by correlating flow cytometry data with complete blood lymphocyte counts obtained from EDTA-anticoagulated whole blood specimens.

**Viral Load Monitoring**

Post-infusion viral monitoring protocols included routine screening for Epstein-Barr virus (EBV) and cytomegalovirus (CMV). Quantitative PCR analysis of plasma samples was conducted to measure viral loads, with mandatory monthly assessments during the first three months following infusion. Beyond this initial period, viral load testing was performed at the physician's discretion based on clinical presentation. All patients received standard oral acyclovir prophylaxis. The assay sensitivity threshold was established at 500 copies/mL for both EBV and CMV detection. Therapeutic interventions consisted of continuous ganciclovir administration upon detection of viral reactivation, with foscarnet sodium combined with immunoglobulin therapy reserved for consideration in refractory cases.

**References：**

1. Pan, J., et al., *Donor-Derived CD7 Chimeric Antigen Receptor T Cells for T-Cell Acute Lymphoblastic Leukemia: First-in-Human, Phase I Trial.* J Clin Oncol, 2021. **39**(30): p. 3340-3351.

2. Tan, Y., et al., *Long-term follow-up of donor-derived CD7 CAR T-cell therapy in patients with T-cell acute lymphoblastic leukemia.* J Hematol Oncol, 2023. **16**(1): p. 34.
